# Supplementary material for: A scalable method to improve gray matter segmentation at ultra high field MRI
Source: PubMed Central journal article supplement (PMC5991408; doi:10.1371/journal.pone.0198335), 2018-06-06
Supplement: pone.0198335.s015.pdf [file pone.0198335.s015.pdf]

**S1 Table. Segmentation performance MPRAGE data without artifact masking.** The table shows the DICE (larger is better) and AVHD (less is better) for the initial SPM 12 and FSL FAST GM segmentations as well as after additional polishing, using either the gradient magnitude or the compositional data method.

|               | SPM    |        | FAST   |        |
|---------------|--------|--------|--------|--------|
|               | DICE   | AVHD   | DICE   | AVHD   |
| S02           |        |        |        |        |
| Init          | 0.8576 | 0.7413 | 0.8896 | 0.5375 |
| Init + GraMag | 0.8594 | 0.5865 | 0.8902 | 0.4980 |
| Init + CoDa   | 0.8525 | 0.6061 | 0.8421 | 0.5557 |
| S03           |        |        |        |        |
| Init          | 0.8644 | 0.8753 | 0.8694 | 0.5739 |
| Init + GraMag | 0.8376 | 0.6139 | 0.8781 | 0.5612 |
| Init + CoDa   | 0.8483 | 0.6299 | 0.8386 | 0.5687 |
| S05           |        |        |        |        |
| Init          | 0.8569 | 0.6379 | 0.8782 | 0.5230 |
| Init + GraMag | 0.8688 | 0.5647 | 0.8909 | 0.5233 |
| Init + CoDa   | 0.8596 | 0.5591 | 0.8692 | 0.5150 |
| S06           |        |        |        |        |
| Init          | 0.8601 | 0.7789 | 0.8635 | 0.6477 |
| Init + GraMag | 0.8435 | 0.5797 | 0.8616 | 0.5909 |
| Init + CoDa   | 0.8442 | 0.6287 | 0.8580 | 0.5530 |
| S07           |        |        |        |        |
| Init          | 0.8897 | 0.6403 | 0.8490 | 0.7228 |
| Init + GraMag | 0.8893 | 0.5574 | 0.8460 | 0.6862 |
| Init + CoDa   | 0.8508 | 0.5974 | 0.7935 | 0.7305 |

DICE, DICE Coefficient; AVHD, Average Hausdorff Distance; GraMag, gradient magnitude method; CoDa, compositional data method.
